# Supplementary material
Source: HighWire-hosted journal article supplement (https://jnnp.bmj.com/content/90/5/617)
Supplement: inline-supplementary-material-1 [file inline-supplementary-material-1.pdf]

**eTable 1.** Patients information. Age = age at injury in years; TBI = traumatic brain injury; GCS = best Glasgow Coma Score selected in the 24h acute electroencephalogram recording; Acute EEG = electroencephalogram recording performed at the acute stage (time post-injury in days); Acute MRI = Magnetic Resonance Imaging recording performed at the acute stage (time post-injury in days); Chronic MRI = Magnetic Resonance Imaging recording performed at 6-month follow-up (time post-injury in days); GOS-E<sub>6m</sub> = Glasgow outcome scores – extended at 6 months.

| N  | Gender | Age | Etiology | GCS | Acute EEG | Acute MRI | Chronic MRI | GOS-E <sub>6m</sub> |
|----|--------|-----|----------|-----|-----------|-----------|-------------|---------------------|
| 1  | Male   | 24  | TBI      | 10  | 2         | 8         | 183         | 7                   |
| 2  | Female | 57  | TBI      | 3   | 8         | 17        | 176         | 3                   |
| 3  | Female | 54  | TBI      | 9   | 14        | 16        | 174         | 5                   |
| 4  | Male   | 21  | TBI      | 7   | 1         | 13        | 174         | 3                   |
| 5  | Male   | 38  | TBI      | 7   | 6         | 6         | 172         | 3                   |
| 6  | Male   | 43  | TBI      | 7   | 4         | 4         | 186         | 6                   |
| 7  | Male   | 21  | TBI      | 7   | 5         | 4         | 185         | 7                   |
| 8  | Female | 35  | TBI      | 7   | 2         | 3         | 158         | 5                   |
| 9  | Male   | 31  | TBI      | 9   | 1         | 3         | 211         | 5                   |
| 10 | Male   | 48  | TBI      | 8   | 5         | 5         | 191         | 5                   |
| 11 | Male   | 36  | TBI      | 3   | 2         | 3         | 204         | 5                   |
| 12 | Female | 77  | TBI      | 9   | 8         | 9         | 184         | 3                   |
| 13 | Male   | 41  | TBI      | 6   | 1         | 1         | 193         | 2                   |
