# Supplementary material
Source: HighWire-hosted journal article supplement (https://jnnp.bmj.com/content/90/5/617)
Supplement: inline-supplementary-material-3 [file inline-supplementary-material-3.pdf]

**eTable 2.** MRI shape analysis. Regions showing significant pathology in correlation with (A) time post injury, (B) clinical outcome measure (GOS-E<sub>6m</sub>), (C) EEG spectra components, (D) covariates.

| <b>Structure</b>                       | <b>Hem</b> | <b>Variable</b>        | <b>T</b>  | <b>p</b> | <b>Vol (mm<sup>3</sup>)</b> |
|----------------------------------------|------------|------------------------|-----------|----------|-----------------------------|
| <i>A. Atrophy over time</i>            |            |                        |           |          |                             |
| Hippocampus                            | R          |                        | 6.643592  | 0.0032   | 1275                        |
| Hippocampus                            | L          |                        | 8.041862  | 0.0022   | 1050                        |
| Thalamus                               | R          |                        | 8.299739  | <0.001   | 1037                        |
| Thalamus                               | L          |                        | 5.949765  | 0.002    | 1020                        |
| Caudate                                | L          |                        | 5.040656  | 0.0014   | 513                         |
| Globus Pallidus                        | R          |                        | 4.163669  | 0.014    | 341                         |
| Brain Stem                             |            |                        | 4.29643   | 0.0368   | 315                         |
| Caudate                                | R          |                        | 4.409225  | 0.0116   | 290                         |
| Globus Pallidus                        | L          |                        | 5.554589  | 0.0066   | 221                         |
| <b>Cumulative atrophy</b>              |            |                        |           |          | <b>6,062 (22.6%)</b>        |
| <i>B. Outcome (GOS-E<sub>6m</sub>)</i> |            |                        |           |          |                             |
| Thalamus                               | L          |                        | 7.737079  | 0.0232   | 712                         |
| Putamen                                | R          |                        | 16.373245 | 0.01     | 368                         |
| <b>Cumulative atrophy</b>              |            |                        |           |          | <b>1,080 (4.0%)</b>         |
| <i>C. EEG Components</i>               |            |                        |           |          |                             |
| Thalamus                               | L          | EEG c1 ( $\alpha$ )    | 5.789311  | 0.0108   | 652                         |
| <b>Cumulative atrophy</b>              |            |                        |           |          | <b>652 (2.4%)</b>           |
| Thalamus                               | L          | EEG c3 ( $\delta$ var) | 10.407843 | 0.0016   | 1394                        |
| Putamen                                | R          | EEG c3 ( $\delta$ var) | 18.371922 | 0.0032   | 767                         |
| Putamen                                | L          | EEG c3 ( $\delta$ var) | 7.609609  | 0.0154   | 480                         |

|                                  |   |                        |           |        |                      |
|----------------------------------|---|------------------------|-----------|--------|----------------------|
| Thalamus                         | R | EEG c3 ( $\delta$ var) | 7.53942   | 0.0158 | 189                  |
| Globus Pallidus                  | R | EEG c3 ( $\delta$ var) | 8.294379  | 0.0076 | 48                   |
| <b>Cumulative atrophy</b>        |   |                        |           |        | <b>2,878 (10.7%)</b> |
| <hr/> <i>D. Covariates</i> <hr/> |   |                        |           |        |                      |
| Caudate                          | L | COVAR c1- (age/sex)    | 4.577825  | 0.0254 | 521                  |
| Thalamus                         | R | COVAR c1+ (age/sex)    | 4.048131  | 0.0396 | 156                  |
| <b>Cumulative atrophy</b>        |   |                        |           |        | <b>677 (2.5%)</b>    |
| Hippocampus                      | R | COVAR c2+ (exp vars)   | 5.911126  | 0.0492 | 5                    |
| Putamen                          | R | COVAR c2- (exp vars)   | 12.095305 | <0.001 | 1422                 |
| Thalamus                         | L | COVAR c2- (exp vars)   | 4.552064  | 0.0226 | 1154                 |
| Putamen                          | L | COVAR c2- (exp vars)   | 5.314573  | 0.0182 | 873                  |
| Caudate                          | R | COVAR c2- (exp vars)   | 5.01421   | 0.0364 | 605                  |
| Caudate                          | L | COVAR c2- (exp vars)   | 3.739898  | 0.0316 | 504                  |
| Pallidum                         | R | COVAR c2- (exp vars)   | 4.331875  | 0.0252 | 346                  |
| Pallidum                         | L | COVAR c2- (exp vars)   | 4.926519  | 0.0342 | 282                  |
| Hippocampus                      | L | COVAR c2- (exp vars)   | 4.67309   | 0.0406 | 71                   |
| <b>Cumulative atrophy</b>        |   |                        |           |        | <b>5,262 (19.6%)</b> |
